# Supplementary material for: Identifying the key regulators that promote cell-cycle activity in the hearts of early neonatal pigs after myocardial injury
Source: PubMed Central journal article supplement (PMC7392272; doi:10.1371/journal.pone.0232963), 2020-07-30
Supplement: pone.0232963.s001.pdf [file pone.0232963.s001.pdf]

### $\beta$ -Catenin

P1-NL P7-NL P7-MI P28-NL P28-MI

94KD

### Pho-Gsk-3

P1-NL P7-NL P7-MI P28-NL P28-MI

50KD

### Total-GSK-3

P1-NL P7-NL P7-MI P28-NL P28-MI

50KD

### Pho-Akt

P1-NL P7-NL P7-MI P28-NL P28-MI

60KD

### Total-Akt

P1-NL P7-NL P7-MI P28-NL P28-MI

60KD

### Pho-p42/44 MAPK

P1-NL P7-NL P7-MI P28-NL P28-MI

42KD

### Total-p42/44 MAPK

P1-NL P7-NL P7-MI P28-NL P28-MI

42KD

### GAPDH

P1-NL P7-NL P7-MI P28-NL P28-MI

36KD

The PVGF membrane was incubated with HRP-conjugated secondary antibodies for half an hour and rinsed with wash buffer, then enhanced chemiluminescence (ECL) was added and images were captured in a Biorad Gel Doc System.
